# Supplementary material
Source: PubMed Central journal article supplement (PMC6264631)
Supplement: jci-128-123360-s220.pdf [file jci-128-123360-s220.pdf]

## Supplemental Data

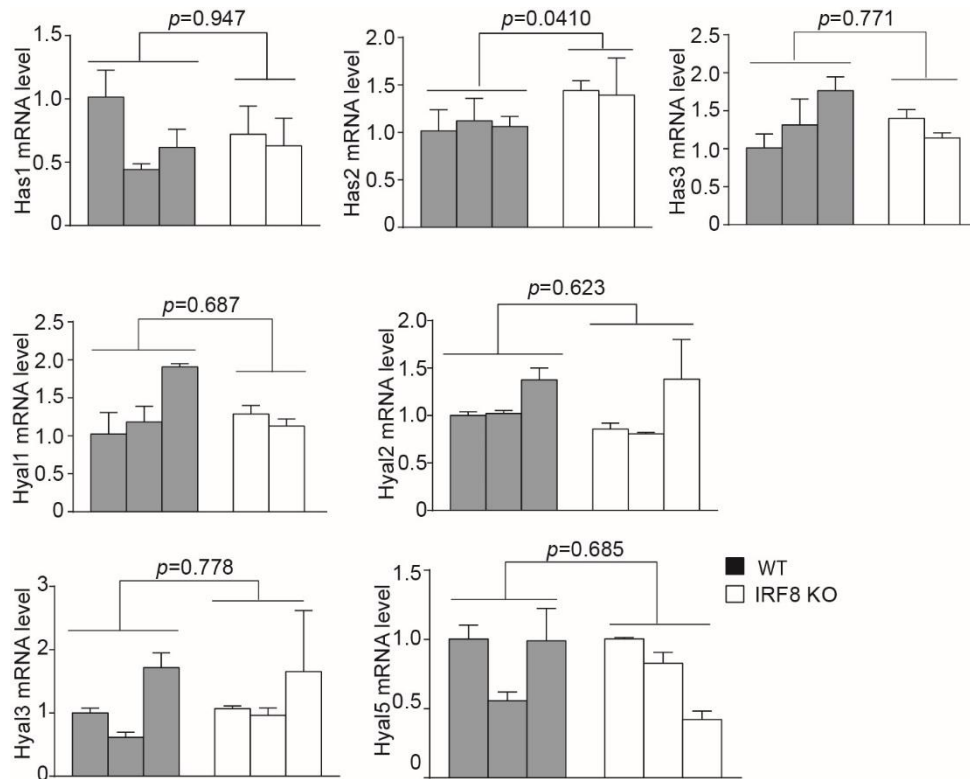

**Figure S1. Expression level of hyaluronan metabolism pathway genes.** Total RNA was isolated from spleens of WT (n=3) and IRF8.KO (n=2-3) mice and analyzed by real-time RT-PCR using gene-specific primer pairs as indicated.  $\beta$ -actin was used as internal control.

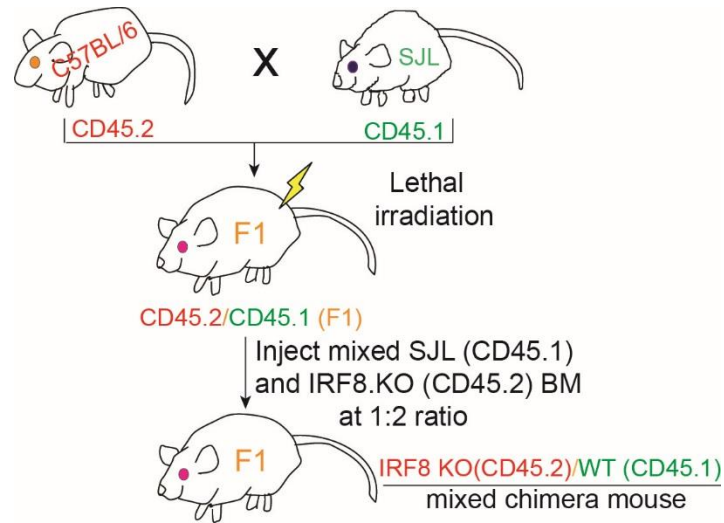

**Figure S2. Scheme of creation of mixed BM chimera mice.** C57BL/6 mice were crossed with SJL mice to generate F1 hybrid mice. BM cells from SJL and IRF8.KO mice were then mixed (at 1:2 or 1:5 ratio of SJL: IRF8.KO) and adoptively transferred to the lethally-radiated F1 hybrid mice to generate mixed chimera mice.

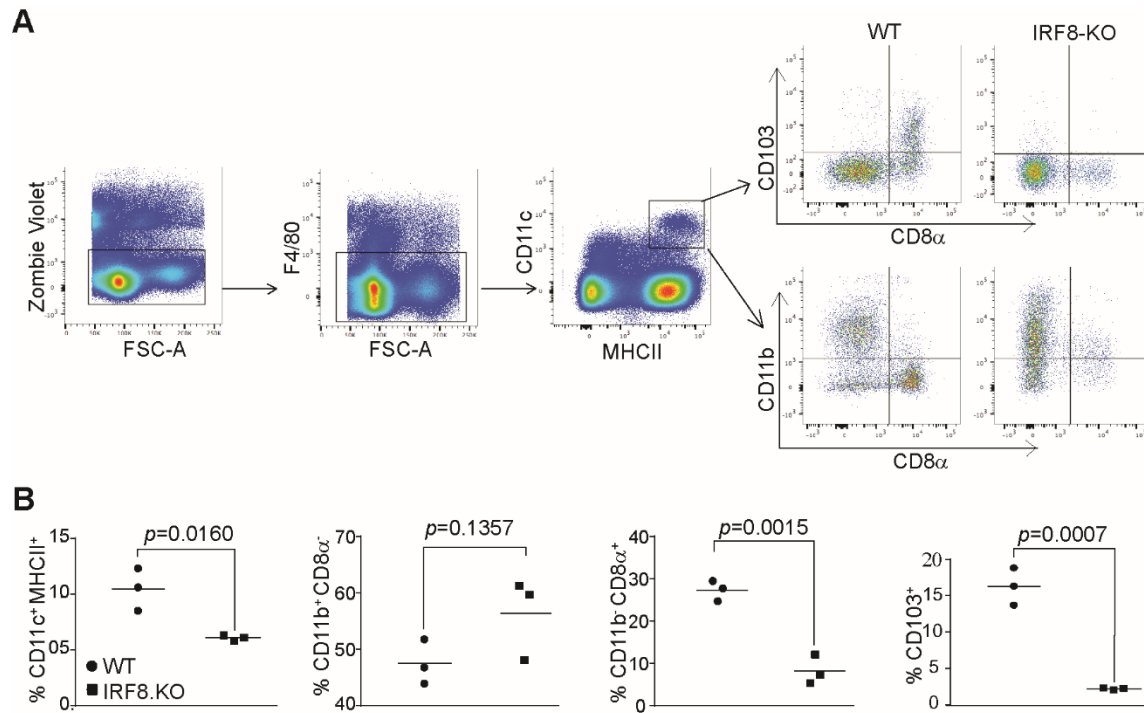

**Figure S3. Myeloid cell profiles in IRF8.KO mice.** **A.** Gating strategy. Peripheral blood was stained with the indicated antibodies. Live cells were gated and analyzed for F4/80<sup>+</sup> cells which were then for CD11c<sup>+</sup>MHCII<sup>+</sup> cells. The CD11c<sup>+</sup>MHCII<sup>+</sup> myeloid cells were then analyzed for the indicated APCs. **B.** Quantification of indicated subsets of APCs in WT (n=3) and IRF8.KO (n=3) mice.

**Table S1. Oligo sequences**

| Primer Name        | Sequence (5'→3')                  | Use                                             |
|--------------------|-----------------------------------|-------------------------------------------------|
| Has1-F1            | GTGCGAGTGTGGATGAAGACC             | qPCR                                            |
| Has1-B1            | CCACATTGAAGGCTACCCAGTATC          |                                                 |
| Has2-F1            | GCCATTTTCCGAATCCAAACAGAC          | qPCR                                            |
| Has2-B1            | CCTGCCACACTTATTGATGAGAACC         |                                                 |
| Has3-F1            | GCTTCAGTCCAGAAACCAAAGTAGG         | qPCR                                            |
| Has3-B1            | CCTCGTTCCTCAAGAGAAACAAGG          |                                                 |
| Hyal1-F1           | GCAGCAGCCAAAAACCAGTTC             | qPCR                                            |
| Hyal1-B1           | AGCAGTCAGGGAAGCCATAGTAGC          |                                                 |
| Hyal2-F1           | TCACCACCTTCTACTACGACCGTC          | qPCR                                            |
| Hyal2-B1           | GCGTTCCACAGATTCCTTCAGC            |                                                 |
| Hyal3-F1           | GCATTCACACCCTCTACCTGTTCTG         | qPCR                                            |
| Hyal3-B1           | TGCGGCACTCACTCCAATAGTC            |                                                 |
| Hyal4-F1           | ATAGGAGAAAGTGCTGCGTTGG            | qPCR                                            |
| Hyal4-B1           | GCTGCTCTGGTCACATTGATTATG          |                                                 |
| Hyal5-F1           | AAGAGTTTGAAGAGGCAGCAAGAC          | qPCR                                            |
| Hyal5-B1           | GGGCATTCTCCTTTGTAATCAGC           |                                                 |
| Hyal6-F1           | GACCAAAGCGTTTATGGGGC              | qPCR                                            |
| Hyal6-B1           | TCATCATCTGGGCAACTTCCTG            |                                                 |
| 15729-T            | TGT GAA CTT GGT GCT TGA GG        | <i>Lck-cre</i> genotyping                       |
| oIMR8890-T         | CAG GTT CTT GCG AAC CTC AT        |                                                 |
| oIMR7338-IC        | CTA GGC CAC AGA ATT GAA AGA TCT   | <i>Lck-cre</i> genotyping<br>(internal control) |
| oIMR7339-IC        | GTA GGT GGA AAT TCT AGC ATC ATC C |                                                 |
| Spp1-F1            | GCCTGTTTGGCATTGCCTCCTC            | qPCR                                            |
| Spp1-B1            | CACAGCATTCTGTGGCGCAAGG            |                                                 |
| mSpp1CHIP-ISRE1-F2 | TTAACCCCAAGTGGCTACACG             | ChIP-qPCR                                       |
| mSpp1CHIP-ISRE1-B2 | TCATGTTGAAGTCCCCTTAAAGTAG         |                                                 |
| mSpp1CHIP-ISRE2-F2 | GGATCCCTGATGCTCTTCCG              | ChIP-qPCR                                       |
| mSpp1CHIP-ISRE2-B2 | TCCTCCTCTGGTTTTGTGGT              |                                                 |
| mIrf8-Q-F          | GATCGAACAGATCGACAGCA              | qPCR                                            |
| mIrf8-Q-B          | GCTGGTTCAGCTTTGTCTCC              |                                                 |
| mIrf8-FW           | CATGGCACTGGTCCAGATGTCTTCC         | Irf8 whole body<br>genotyping                   |
| mIrf8-wt-RV        | CTTCCAGGGGATACGGAACATGGTC         |                                                 |
| mIrf8-KO-RV        | CGAAGGAGCAAAGCTGCTATTGGCC         |                                                 |
| mIrf8exon1F        | GCGCGGGCAGCGTGGGAACCGGCG          | Irf8 flox genotyping                            |
| mIrf8exon3B        | GTCACCTTCTCAAATCTGGGCTC           |                                                 |
| mSpp1 ISRE-1F      | TCAAATGTCATTTTCAATTTTACGAGTATTC   | EMSA mSpp1-<br>ISRE1                            |
| mSpp1 ISRE-1B      | GAATACTCGTGAAAATGAAATGACATTTGA    |                                                 |
| mSpp1 ISRE-2F      | AATGCTTTGTGTGTGTTTTCTTTTCTTCCT    | EMSA mSpp1-<br>ISRE2                            |
| mSpp1 ISRE2-B      | AGGAAGAAAAGGAAACACACACAAAGCATT    |                                                 |
| mPD-1 ISRE-F       | CTAATATTAGCAGTTTCGTTTTCCCTTTTT    | EMSA mPD-1-<br>ISRE                             |
| mPD-1 ISRE-B       | AAAAAGGGAAAACGAACTGCTAATATTAG     |                                                 |
| mβ-actin-F         | ATTGTTACCAACTGGGACGACATG          | qPCR                                            |
| mβ-actin-B         | CTTCATGAGGTAGTCTGTCAGGTC          |                                                 |
